# Supplementary material for: Clinical Feasibility Study of Gold Nanoparticles as Theragnostic Agents for Precision Radiotherapy
Source: MDPI journal article supplement (doi:10.3390/biomedicines10051214), 2022-05-23
Supplement: s1 [file s1]

## Supplementary Materials

**Table S1.** Elemental weight proportions of the generated materials.

| Element | Air<br>(density: 0.00120479 g/cm <sup>3</sup> ) | Lung, with air<br>(density: 0.26 g/cm <sup>3</sup> ) | Soft tissue<br>(density: 1.00 g/cm <sup>3</sup> ) | Bone<br>(density: 1.85 g/cm <sup>3</sup> ) |
|---------|-------------------------------------------------|------------------------------------------------------|---------------------------------------------------|--------------------------------------------|
| H       | -                                               | 0.103                                                | 0.10447                                           | 0.064                                      |
| C       | 0.000124                                        | 0.105                                                | 0.23219                                           | 0.278                                      |
| N       | 0.755267                                        | 0.031                                                | 0.02488                                           | 0.027                                      |
| O       | 0.231781                                        | 0.749                                                | 0.63024                                           | 0.410                                      |
| Na      | -                                               | 0.002                                                | 0.00113                                           | -                                          |
| Mg      | -                                               | -                                                    | 0.00013                                           | 0.002                                      |
| P       | -                                               | 0.002                                                | 0.00133                                           | 0.070                                      |
| S       | -                                               | 0.003                                                | 0.00199                                           | 0.002                                      |
| Cl      | -                                               | 0.003                                                | 0.00134                                           | -                                          |
| Ar      | 0.012827                                        | -                                                    | -                                                 | -                                          |
| K       | -                                               | 0.002                                                | 0.00199                                           | -                                          |
| Ca      | -                                               | -                                                    | 0.00023                                           | 0.147                                      |
| Fe      | -                                               | -                                                    | 0.00005                                           | -                                          |
| Zn      | -                                               | -                                                    | 0.00003                                           | -                                          |
| Total   | 1                                               | 1                                                    | 1                                                 | 1                                          |

**Table S2.** AuNP material elemental composition. Weight proportions inferred from 'soft tissue' material.

| Elements     | 2.23 mg Au/g of tissue<br>(density: 1.00223 g/cm <sup>3</sup> ) | 22.3 mg Au/g of tissue<br>(density: 1.02230 g/cm <sup>3</sup> ) | 40 mg Au/g of tissue<br>(density: 1.18290 g/cm <sup>3</sup> ) |
|--------------|-----------------------------------------------------------------|-----------------------------------------------------------------|---------------------------------------------------------------|
| H            | 0.10423903                                                      | 0.10214227                                                      | 0.10029312                                                    |
| C            | 0.23167222                                                      | 0.22701216                                                      | 0.22290240                                                    |
| N            | 0.02482452                                                      | 0.02432518                                                      | 0.02388480                                                    |
| O            | 0.62883257                                                      | 0.61618369                                                      | 0.60502848                                                    |
| Na           | 0.00112748                                                      | 0.00110480                                                      | 0.00108480                                                    |
| Mg           | 0.00012971                                                      | 0.00012710                                                      | 0.00012480                                                    |
| P            | 0.00132703                                                      | 0.00130034                                                      | 0.00127680                                                    |
| S            | 0.00198556                                                      | 0.00194562                                                      | 0.00191040                                                    |
| Cl           | 0.00133701                                                      | 0.00131012                                                      | 0.00128640                                                    |
| K            | 0.00198556                                                      | 0.00194562                                                      | 0.00191040                                                    |
| Ca           | 0.00022949                                                      | 0.00022487                                                      | 0.00022080                                                    |
| Fe           | 0.00004989                                                      | 0.00004889                                                      | 0.00004800                                                    |
| Zn           | 0.00002993                                                      | 0.00002933                                                      | 0.00002880                                                    |
| Au           | 0.00223000                                                      | 0.02230000                                                      | 0.04000000                                                    |
| <b>Total</b> | <b>1</b>                                                        | <b>1</b>                                                        | <b>1</b>                                                      |

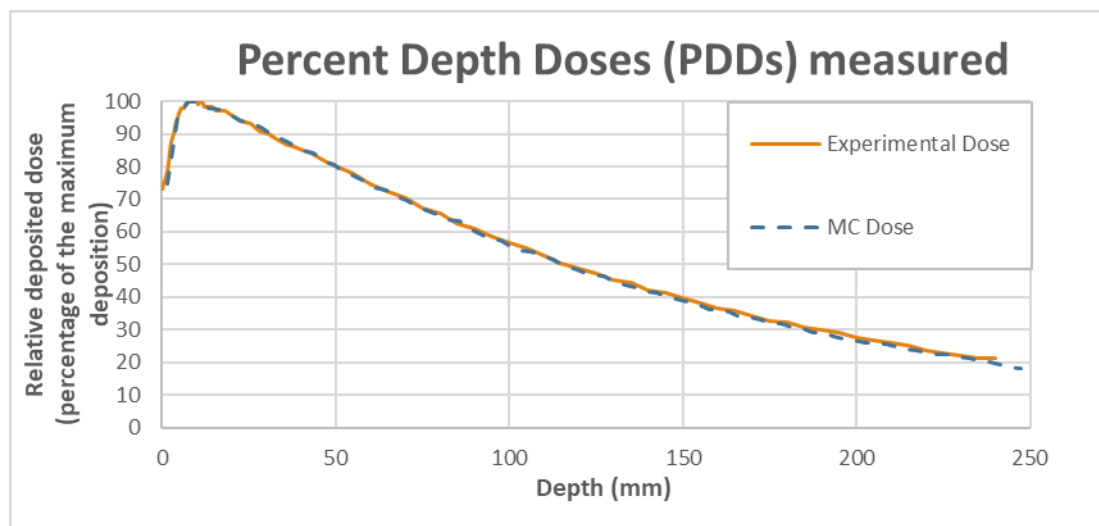

**Figure S1.** Percent depth dose (PDD) profiles measured in both experimental dosimetry (orange solid line) and Monte Carlo (MC) simulations (blue dashed line).

**Table S3.** CT data of each standardized material scanned.

| Material                             | Physical density (g/cm <sup>3</sup> ) | Electronical density (x10 <sup>23</sup> electrons/cm <sup>3</sup> ) | HU     |
|--------------------------------------|---------------------------------------|---------------------------------------------------------------------|--------|
| Lung (inhaled)                       | 0.2                                   | 0.634                                                               | -829.1 |
| Lung (exhaled)                       | 0.5                                   | 1.632                                                               | -489.1 |
| Adipose                              | 0.96                                  | 3.170                                                               | -72.6  |
| Breast (50% adipose/50% glandular)   | 0.99                                  | 3.261                                                               | -34.4  |
| Muscle                               | 1.06                                  | 3.483                                                               | 46.7   |
| Liver                                | 1.07                                  | 3.516                                                               | 55.4   |
| Dense bone (800 mg/cm <sup>3</sup> ) | 1.53                                  | 4.862                                                               | 1036.1 |

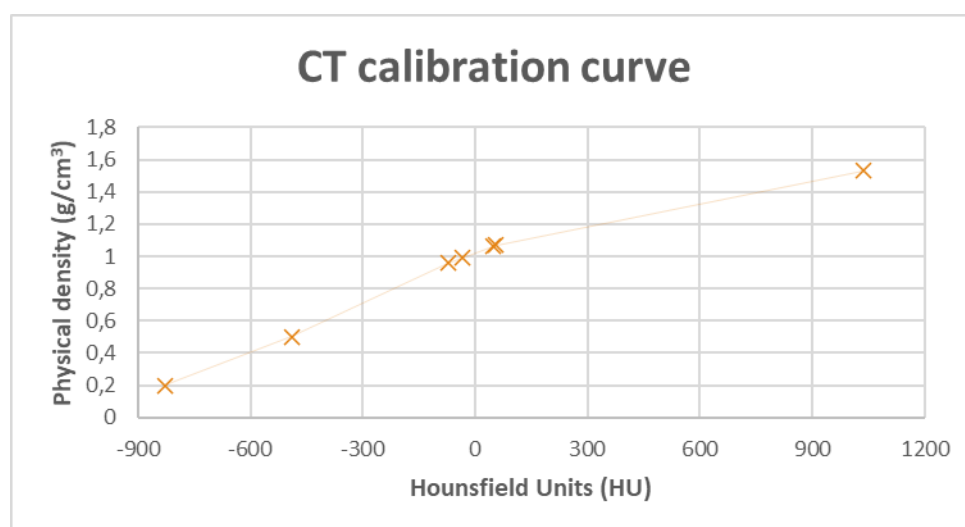

**Figure S2.** CT calibration curve obtained when representing physical density vs. HU of each material, based on data represented in table S3.

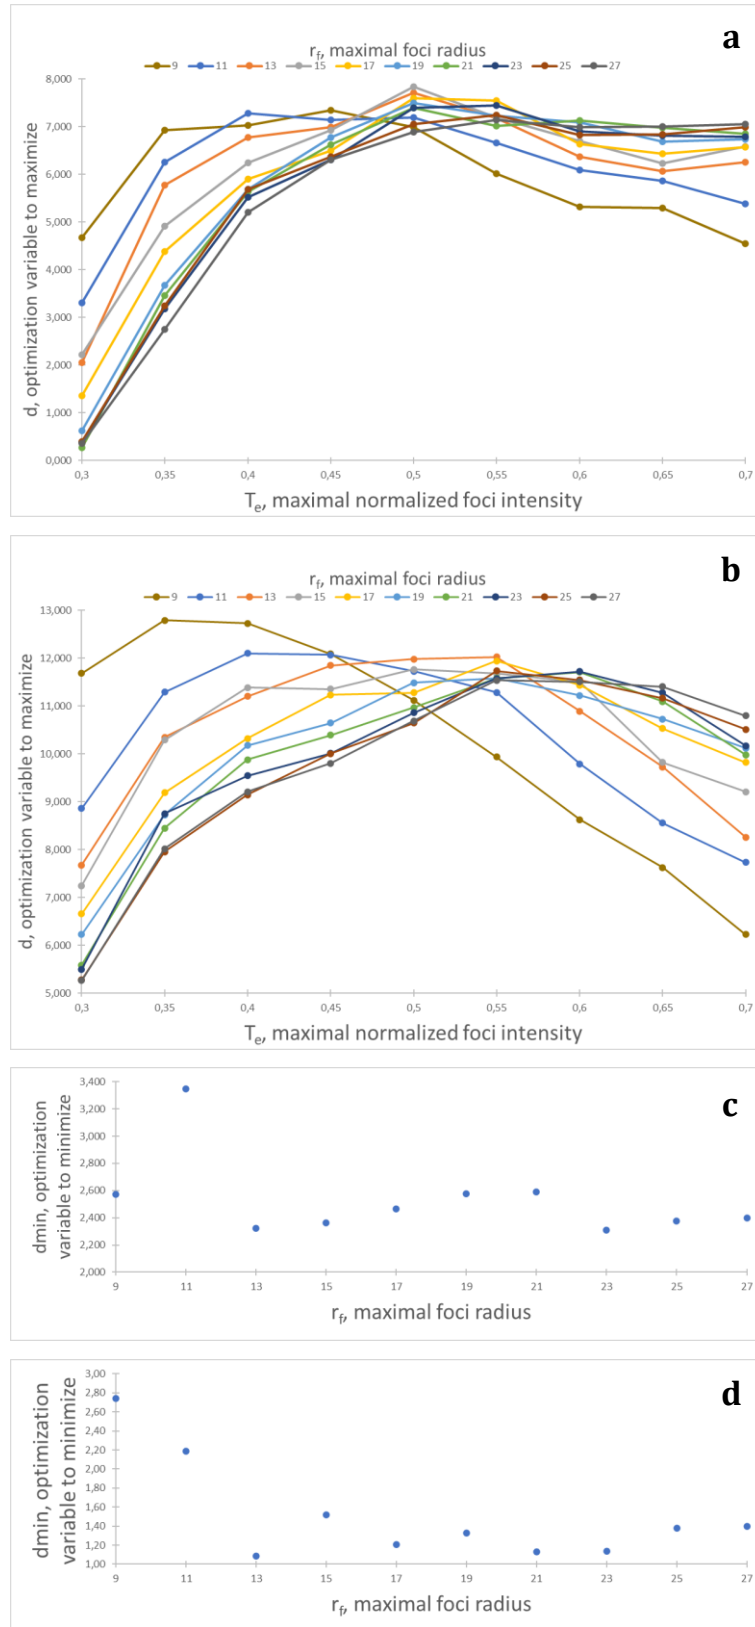

**Figure S3.** Optimization curves for parameters  $r_f$ ,  $T_e$ . (a, b) First optimization procedure without nanoparticles (a) and with nanoparticles (b). (c, d) Second optimization procedure without nanoparticles (c) and with nanoparticles (d).

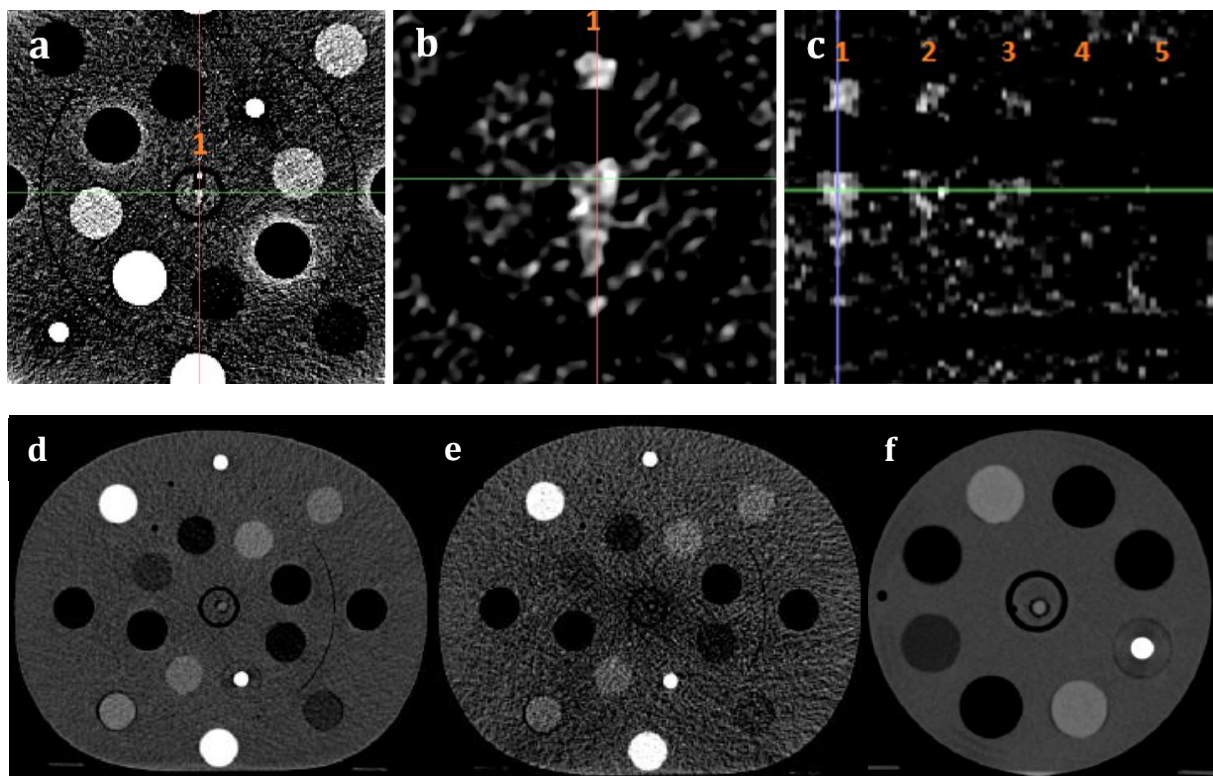

**Figure S4.** (a, b, c) CT scan images for the seriated AuNP concentrations experiment, in  $\sim 0.2 \text{ cm}^3$  tubes. The axes are centered in the radiological concentration. (a) Axial slice, (b) detailed zoom with a narrower window level, and (c) sagittal slice where other concentrations are present. Each vial contains the following: (1) original AuNP concentration of 2,23 mg Au/mL, (2) dilution with 1:2 factor, (3) dilution with 1:4 factor, (4) water, (5) air.

(d, e, f) Axial slices from three different acquisitions of the phantom containing the AuNP vial positioned in the center of the central insert are shown. Window level was adjusted to the same level for all three images – from -60 to 200 HU, and the acquisition energy was 120 keV for all of them. Images correspond to (d) body configuration in phantom, 'wholebody' reconstruction, 5 mm slice thickness; (e) body configuration in the phantom, 'wholebody' reconstruction, 0.6 mm slice thickness, (f) head & neck phantom configuration, 'brain' reconstruction, 3 mm slice thickness; a zoom regarding images (d) and (e) was applied.

**Files S1.** Immunofluorescence images, available to download at <https://hdvirtual.us.es/discovirt/index.php/s/aa7K5aMf7G9i6Fe>
